# Supplementary material
Source: PubMed Central journal article supplement (PMC3081044)
Supplement: 10616_2011_9335_MOESM1_ESM.pdf [file 10616_2011_9335_MOESM1_ESM.pdf]

## ESM.pdf

### Effect of rtTA-M2 and rtTA on basal and inducible TRE-mediated transcription.

(a) Structures of expression units. CMVpro; cytomegalovirus promoter. (b) NIH3T3 cells were transiently co-transfected with the pTRE-Luc reporter plasmid (10 ng), together with prtTA-M2 (100 ng) or prtTA (100 ng). pCH110 (100 ng) was used as a control for transfection efficiency. Empty vector (pcDNA3) was used to standardize the total amount of transfected DNA (210 ng). Dox (10-1000 ng/ml) was added to the cell culture medium. \* indicates  $p < 0.05$  compared with control cells transfected with pcDNA3 in the absence of Dox (Student's *t* test). # indicates  $p < 0.05$  compared with cells expressing rtTA in the presence of each dose of Dox (Student's *t* test).

Article title: Development of the tetracycline-dependent transcription activator and repressor co-expression system to tightly regulate and highly induce transgene expression

Journal name: Cytotechnology

Author names: Hiroshi Hosoda<sup>1, #</sup>, Takahisa Miyao<sup>1, #</sup>, Shusaku Uchida<sup>2</sup>, Shinsuke Sakai<sup>2</sup> and Satoshi Kida<sup>1, 2, #, \*</sup>

Affiliation and e-mail address of the corresponding author: *PhD. Satoshi KIDA, Department of Bioscience, Faculty of Applied Bioscience, Tokyo University of Agriculture, 1-1-1 Sakuragaoka, Setagaya-ku, Tokyo 156-8502, Japan. E-mail: [kida@nodai.ac.jp](mailto:kida@nodai.ac.jp)*

# EMS

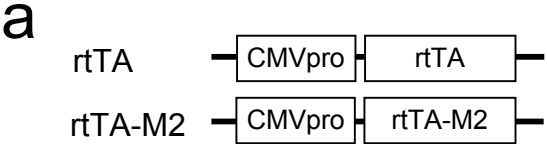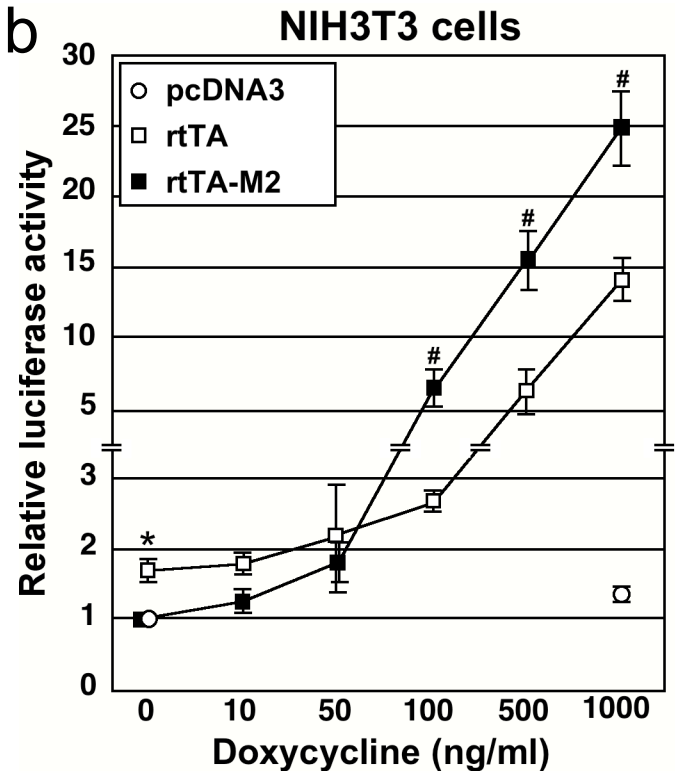

Hosoda et al.
